# Supplementary material for: Anti-Hypochlorite and Catalytic Activity of Commercially Available Moringa oleifera Diet Supplement
Source: MDPI journal article supplement (doi:10.3390/molecules24183330), 2019-09-12
Supplement: s1 [file s1]

Supplementary materials:

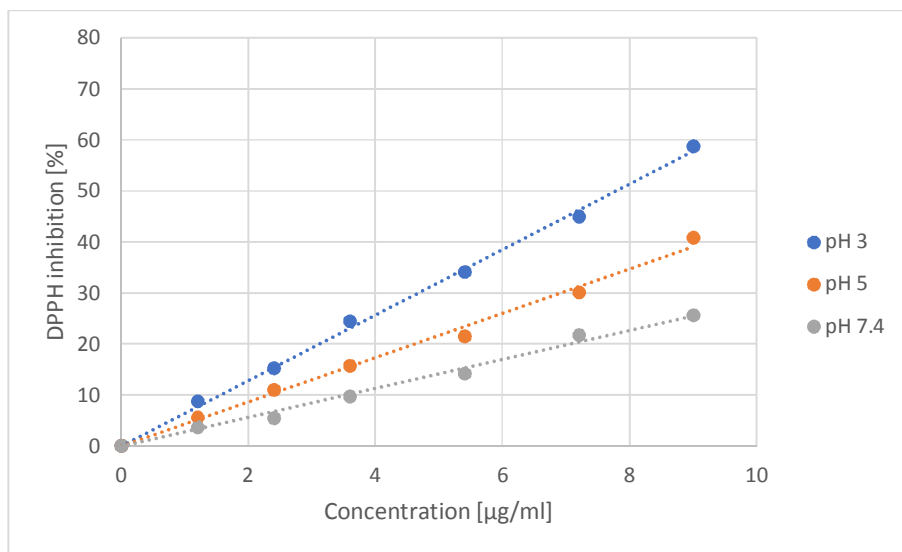

Figure S1. DPPH reduction percentage of ascorbic acid at various pH values after 30 min of reaction at 25 °C.

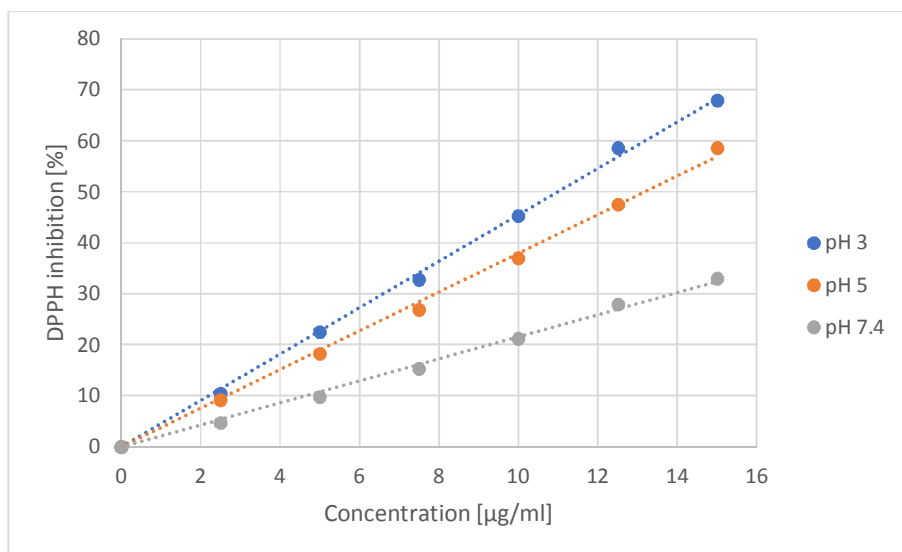

Figure S2. DPPH reduction percentage of Trolox at various pH values after 30 min of reaction at 25 °C.

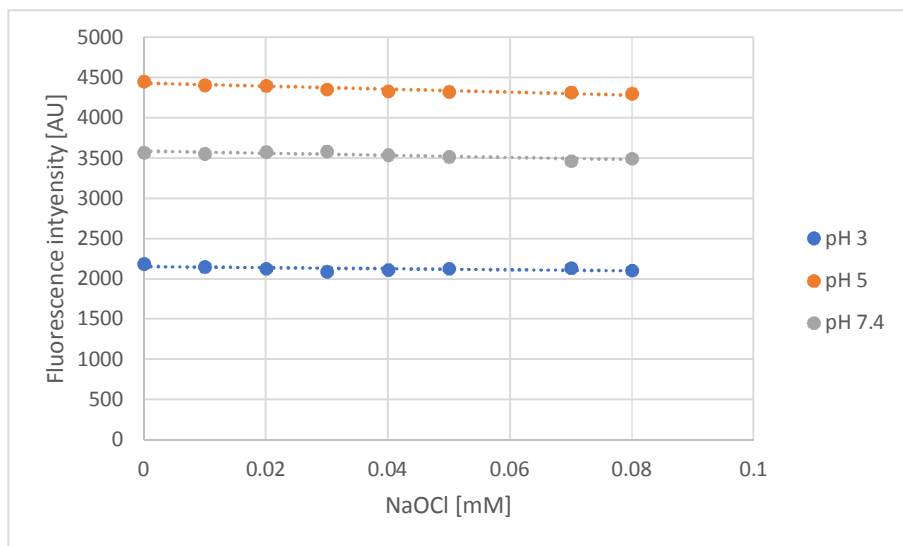

Figure S3. Changes in fluorescence intensity of 7-DCCA (0.04 mg/ml) after 15 minutes of ascorbic acid (0.005 mg/ml) incubation with NaOCl. The measurements were carried out at  $\lambda_{\text{Ex}}$  289 nm,  $\lambda_{\text{Em}}$  460 nm, and at a temperature of 25 °C.
